# Supplementary material for: Placebo Analgesia Changes on Self-Pain and Empathy for Pain: Influences of Event-Related EEG Oscillations, Heart Rate Variability, and Personality
Source: Research Square preprint supplement (doi:10.21203/rs.3.rs-1143276/v1), 2021-12-13
Supplement: Supplementary file 2 [file 2abfb1b8f2995c3494032e8c.xlsx]

## Sheet: Foglio1
Table 2.
Descriptive statistics for PCA factor difference scores (Control minus Placebo, ∆) including ∆Frequency HRV (∆fHRV), ∆Standard Deviation of RR time intervals (∆SDNN), ∆Sampling Entropy (∆S-Entr), frequency bands of ϑ, α, β1, β2, and γ (∆Midl-ϑPow, ∆Cz-αPow, ∆CzPz-αPow, ∆Midl-β1Pow, ∆Midl-β2Pow, and ∆CzPz-γPow), respectively for Self-Pain (S) and Other-Pain (O) conditions.
Self-Pain						Other-Pain
Variable	Mean	Std Dev	Min	Max		Variable	Mean	Std Dev	Min	Max
S_∆fHRV	1.247	7.921	-15.2	18.35		O_∆fHRV	0.87	12.21	-24.74	55.7
S_∆SDNN & ∆S-Entr	-6.74	80.61	-611	119.4		O_∆tHRV & ∆S-Entr	-4.31	27.19	-91.1	46.56
S_∆tHRV & ∆Midl-ϑPow	-9.42	24.23	-61.7	57.52		O_∆Midl-ϑPow	-0.53	3.692	-17.51	8.93
S_∆SDNN & ∆S-Entr & ∆Cz-αPow	-7.5	67.06	-512	96.9		O_∆FzCz-αPow	-3.54	25.72	-86.4	47.34
S_∆tHRV & ∆CzPz-αPow	-15.1	58.35	-125	226.3		O_∆Midl-β1Pow	-0.167	2.911	-9.50	8.8
S_∆Midl-β1Pow	2.116	7.008	-10.4	46.38		O_∆Midl-β2Pow	-0.26	8.78	-38.89	31.4
S_∆Midl-β2Pow	3.039	11.91	-13.8	84.49		O_∆Midl-γPow	0.103	3.307	-12.1	11.16
S_∆tHRV & ∆CzPz-γPow	-17.2	49.58	-120	117.4		-	-	-	-	-
