# Supplementary material for: Placebo Analgesia Changes on Self-Pain and Empathy for Pain: Influences of Event-Related EEG Oscillations, Heart Rate Variability, and Personality
Source: Research Square preprint supplement (doi:10.21203/rs.3.rs-1143276/v1), 2021-12-13
Supplement: Supplementary file 3 [file 31e126ad542e7ecdafd128d1.xlsx]

## Sheet: Foglio1
Table 5. Left-half table: Partial Pearson correlation coefficients of the Behavioral Inhibition System (BIS) personality trait and numerical pain and distress difference scores (Control minus Placebo) in the self-pain (S-NPDS, S-NUDS) condition with HRV and EEG band power difference (∆, Control minus Placebo) factors of interest. Right-half table: Partial Pearson correlation coefficients of Affec…
Self-Pain					Other-Pain
	BIS	S_NPDS	S_NUDS			AE	TEA	O_NPDS
S_∆fHRV	-0.2851	-0.0275	-0.1419		O_∆f HRV	-0.0547	0.20115	0.385*
S_∆SDNN & ∆S-Entr	-0.15456	-0.00502	0.00432		O_∆tHRV & ∆S-Entr	-0.374*	-0.27372	0.03351
S_∆tHRV & ∆Midl-ϑPow	0.380*	-0.502•	-0.355*		O_∆Midl-ϑPow	0.00087	-0.28681	-0.422*
S_∆SDNN & ∆S-Entr & ∆Cz-αPow	-0.128	-0.03753	-0.0174		O_∆FzCz-αPow	0.2613	-0.0295	-0.30849
S_∆tHRV & ∆CzPz-αPow	0.397*	-0.389*	-0.27437		O_∆Midl-β1Pow	-0.06532	0.27379	0.32337
S_∆Midl-β1Pow	-0.09811	0.30051	0.20293		O_∆Midl-β2Pow	0.1477	0.405*	0.418*
S_∆Midl-β2Pow	-0.02707	0.24039	0.16933		O_∆Midl- γPow	0.16742	0.379*	0.32829
S_∆tHRV & ∆CzPz- γPow	0.415*	-0.472•	-0.329*		-	-	-	-
• p < 0.01; * p < 0.05; (False Discovery Rate correction)
Notes- S_ : self-pain; S_∆fHRV : frequency HRV difference score; S_∆SDNN & ∆S-Entr : Standard deviation of R-R intervals & Sampling Entropy differences; S_∆tHRV & ∆Midl-ϑPow : R-R time interval & Midline ϑ band power differences; S_∆SDNN & ∆S-Entr & ∆Cz-αPow : Standard deviation of R-R intervals & Sampling Entropy & Central (Cz) α band power differences; S_∆tHRV & ∆CzPz-αPow : R-R time interval &…
O_ : other-pain; Labels used for the other-pain conditions follows the same labeling rules used for the self pain.
