# Supplementary material for: Placebo Analgesia Changes on Self-Pain and Empathy for Pain: Influences of Event-Related EEG Oscillations, Heart Rate Variability, and Personality
Source: Research Square preprint supplement (doi:10.21203/rs.3.rs-1143276/v1), 2021-12-13
Supplement: Supplementary file 4 [file 44fe502b1c98881089f66cb5.xlsx]

## Sheet: Foglio1
Table 6.
Upper quadrant - Self-pain condition: a serial multiple mediator model using BIS and FFFS measures as potential mediators of the causal influence of “S_∆tHRV & ∆Midl-ϑPow” on pain minus placebo changes in numerical pain rating score (S_NPDS), with Gender and State-anxiety changes as covariates. Bottom quadrant - Other-pain condition: a simple mediation model testing the contribution of “O_∆Midl-β…
Model-1	Self-Pain: Control minus Placebo difference scores (S-NPDS)
	Outcome: BIS							Outcome: FFFS							Outcome: Self-Pain Reduction (S_NPDS)
Predictors	coeff	se	t	p	LLCI	ULCI		coeff	se	t	p	LLCI	ULCI		coeff	se	t	p	LLCI	ULCI
Constant	61.6391	2.0213	30.4941	0	57.5929	65.6853		20.3171	3.7577	5.4068	0	12.7924	27.8419		0.7456	0.7034	1.0599	0.2937	-0.6635	2.1547
BIS	—	—	—	—	—	—		0.1399	0.0591	2.3659	0.0214	0.0215	0.2584		0.0218	0.0095	2.039	0.05812	-0.000	0.0407
FFFS	—	—	—	—	—	—		—	—	—	—	—	—		-0.0589	0.0202	-2.9203	0.005	-0.0992	-0.0185
S_∆t HRV & ∆Midl-ϑPow	0.2035	0.065	3.1334	0.0027	0.0735	0.3335		0.0124	0.0316	0.3931	0.6957	-0.0509	0.0758		-0.0231	0.0048	-4.8009	0	-0.0328	-0.0135
Covariates
GENDER	-4.4876	3.0869	-1.4537	0.1514	-10.6668	1.6916		-4.7099	1.4156	-3.3271	0.0015	-7.5446	-1.8752		-0.2992	0.2354	-1.2707	0.2091	-0.7708	0.1725
∆State-Anx	-0.0727	0.211	-0.3448	0.7315	-0.495	0.3495		-0.0159	0.0951	-0.1669	0.868	-0.2064	0.1746		0.0146	0.0145	1.006	0.3187	-0.0144	0.0436
	R-sq = 0.235, F(3, 58) = 5.932, p < 0.001							R-sq = 0.337, F(4, 57) = 7.232, p < 0.0001							R-sq = 0.406, F(5, 56) = 7.646, p < 0.0001
Model-2	Other-Pain: Control minus Placebo difference scores (O-NPDSs)
	Outcome: Total Empathic Ability (TEA)							Outcome: Other-Pain Reduction (O_NPDS)
Predictors	coeff	se	t	p	LLCI	ULCI		coeff	se	t	p	LLCI	ULCI
Constant	37.8313	0.7563	50.0223	0	36.3174	39.3452		-2.6532	1.088	-2.4387	0.0179	-4.8318	-0.4746
TEA	—	—	—	—	—			0.0746	0.0284	2.6251	0.0111	0.0177	0.1316
O_∆Midl-β2Pow	0.2113	0.0626	3.377	0.0013	0.0861	0.3366		0.034	0.0148	2.2973	0.0253	0.0044	0.0637
Covariates
GENDER	-2.2669	1.0911	-2.0777	0.0422	-4.451	-0.0829		-0.110	0.2449	-0.451	0.6537	-0.6008	0.380
∆State-Anx	-0.0042	0.0774	-0.0548	0.9564	-0.1591	0.1506		0.014	0.0167	0.8341	0.4077	-0.020	0.0475
	R-sq = 0.193, F(3, 58) = 4.632, p = 0.006							R-sq = 0.273, F(4, 57) = 5.358, p = 0.001
