# Supplementary material for: Placebo Analgesia Changes on Self-Pain and Empathy for Pain: Influences of Event-Related EEG Oscillations, Heart Rate Variability, and Personality
Source: Research Square preprint supplement (doi:10.21203/rs.3.rs-1143276/v1), 2021-12-13
Supplement: Supplementary file 5 [file db9920ab9f336d5ca4b02582.xlsx]

## Sheet: Foglio1
Table 3. Descriptive statistics in women and men participants (1) for the RST-PQ, ECQ, STAI-Y1; (2) for numerical pain and distress scores: (i) of the Self in the Control (SC-NPS, and SC-NDS), Placebo (SP-NPS, and SP-NDS) treatments and Control minus Placebo difference scores (S_NPDS and S_NDDS); (j) of the Other in the Control (OC-NPS, and OC-NDS), Placebo (OP-NPS, and OP-NDS) treatments and Con…
Variable			Women (N=32)					Men (N=30)				Gender
		Mean	SD	Min	Max		Mean	SD	Min	Max		t(60)	p(FDR)
BAS-TOT		94.13	12.92	71	125		89.27	11.13	67	113		1.58	0.4208
BAS-GDP		21.91	3.855	12	28		21.4	2.896	16	28		0.58	0.7363
BAS-RI		20.56	4.557	11	28		20.23	4.133	12	28		0.3	0.8312
BAS-RR		30.97	4.928	19	39		29.27	4.502	20	39		1.42	0.4208
BAS-I		20.69	5.076	3	32		18.37	4.255	10	25		1.94	0.3679
BIS		61.31	12.56	42	85		53.5	11.82	29	80		2.52	0.1829
FFFS		28.88	4.156	23	37		22.87	6.377	12	37		4.42	0.0026
CE		36.25	3.628	27	42		36.6	4.461	24	44		-0.34	0.831
AE		49.63	9.129	32	64		47.27	7.674	24	60		1.1	0.4714
ED		30.22	3.24	23	36		29.03	3.449	20	36		1.4	0.4208
TEA		37.5	5.292	28	56		35.8	3.624	29	44		1.47	0.4208
CTE		87.44	13.99	29	106		82.97	12.74	36	103		1.31	0.4208
STAI-Y1 (C)		36.84	9.808	22	57		33.9	9.29	20	67		1.21	0.4608
STAI-Y1 (P)		36.69	11.31	22	72		33.57	9.961	20	59		1.15	0.4714
SC-NPS		5.409	1.109	1.54	6.71		5.002	1.229	1.21	6.75		1.37	0.4208
SP-NPS		4.99	1.024	2.63	6.79		4.319	1.202	1.46	6.25		2.37	0.0422
S_NPDS		0.419	0.958	-3.09	2.04		0.683	0.986	-0.83	3.29		-1.07	0.4714
SC-NDS		5.151	1.245	1.21	6.75		4.647	1.466	1.04	6.67		1.46	0.4208
SP-NDS		4.742	1.155	2.25	6.29		4.287	1.465	1	6.42		1.36	0.4208
S_NDDS		0.41	1.222	-3.12	2.3		0.36	0.724	-1.17	1.62		0.19	0.8804
OC-NPS		4.97	1.06	2.33	6.5		4.828	1.202	2.08	6.5		0.49	0.7363
OP-NPS		4.876	1.207	2.25	6.5		4.877	1.289	1.17	6.54		0.00	0.9966
O_NPDS		0.09	1.059	-2.71	2.46		-0.049	1.035	-4.05	1.84		0.54	0.7363
OC-NDS		4.973	1.18	2.08	6.5		4.705	1.458	1	6.83		0.8	0.6569
OP-NDS		4.729	1.247	1.83	6.83		4.563	1.329	2.25	6.5		0.51	0.7363
O_NDDS		0.243	0.679	-0.79	2.09		0.142	0.641	-1.25	1.46		0.6	0.7363
Note. Mean (M), Standard Deviation (SD), Minimum (Min), Maximum (Max). Reinforcement Sensistivity Theory-Personality Questionnaire (RST-PQ): Behavioral Approach System (BAS-TOT), Goal-Drive Persistence (BAS-GDP), Reward Interest (BAS-RI), Reward Reactivity (BAS-RR), Impulsivity (BAS-I), Behavioural Inhibition System (BIS) and Fight-Flight-Freeze System (FFFS). State Anxiety in the pain control ST…
