# Supplementary material for: Placebo Analgesia Changes on Self-Pain and Empathy for Pain: Influences of Event-Related EEG Oscillations, Heart Rate Variability, and Personality
Source: Research Square preprint supplement (doi:10.21203/rs.3.rs-1143276/v1), 2021-12-13
Supplement: Supplementary file 6 [file f6551eee76b53a3b71757e1e.xlsx]

## Sheet: Foglio1
Table 4.
Partial correlations for RST-PQ , ECQ personality traits, and Control minus Placebo for State-Anxiety difference scores (∆STAI-Y1), numerical pain and distress rating difference scores, repectively in the self-pain (S_NPDS, S_NUDS) and other-pain conditions (O_NPDS, O_NUDS). The effect of Gender was partial out.
	1	2	3	4	5	6	7	8	9	10	11	12	13	14	15	16	17
1. BAS-TOT	1	0.75‡	0.70‡	0.76‡	0.61‡	0.03	-0.01	0.03	0.33	0.09	0.23	0.21	-0.25445	-0.02	-0.03	-0.08445	0.08
2. BAS-GDP		1	0.55†	0.51†	0.167	-0.04	-0.12	0.07	0.17	-0.02	0.15	0.07	-0.05535	-0.04	-0.05	-0.09053	0.02
3. BAS-RI			1	0.30	0.16	-0.09	-0.03	0.27	0.15	0.01	0.19	0.12	-0.07518	-0.14	-0.13	-0.07659	-0.12
4. BAS-RR				1	0.31	0.16	0.08	-0.04	0.43•	0.25	0.32	0.40*	-0.28064	0.11	0.01	-0.04834	0.16
5. BAS-I					1	0.02	-0.01	-0.19	0.16	0.03	-0.01	-0.01	-0.26219	-0.01	0.09	-0.03159	0.13
6. BIS						1	0.39*	-0.03	0.06	0.02	0.07	0.08	-0.10329	-0.04	-0.01265	-0.0485	0.16
7. FFFS							1	0.06	-0.08	0.07	0.03	0.03	-0.06255	-0.34*	-0.14	0.07628	-0.07
8. CE								1	0.20	0.27	0.49•	0.44•	0.28338	-0.02	-0.14	0.18481	-0.32
9. AE									1	0.40*	0.56†	0.57†	-0.03558	-0.02	0.06	-0.01792	0.03
10. TEA										1	0.41•	0.34*	-0.008	0.01	-0.02	0.44•	-0.21
11. ED											1	0.59†	0.06661	0.13	0.09	0.13269	-0.08
12. CTE												1	-0.07657	-0.02	-0.03	-0.0656	-0.09
13. ∆STAIY1													1	0.18539	0.25252	0.09082	-0.15291
14. S_NPDS														1	0.74‡	-0.13754	0.31
15. S_NUDS															1	-0.21276	0.28
16. O_NPDS																1	0.28
17. O_NUDS																	1
‡ p < 0.0001; † p < 0.001; • p < 0.01; * p < 0.05; (False Discovery Rate correction)
Note. Reinforcement Sensistivity Theory-Personality Questionnaire (RST-PQ): Behavioral Approach System (BAS-TOT), Goal-Drive Persistence (BAS-GDP), Reward Interest
(BAS-RI), Reward Reactivity (BAS-RR), Impulsivity (BAS-I), Behavioural Inhibition System (BIS) and Fight-Flight-Freeze System (FFFS). Empathy Components Questionnaire (ECQ):
Cognitive Empathy (CE), Affective Empathy (AE), Total Empathic Ability (TEA), Empathic Drive (ED), Cumulative Total Empathy (CTE).
