# Supplementary material for: Placebo Analgesia Changes on Self-Pain and Empathy for Pain: Influences of Event-Related EEG Oscillations, Heart Rate Variability, and Personality
Source: Research Square preprint supplement (doi:10.21203/rs.3.rs-1143276/v1), 2021-12-13
Supplement: Supplementary file 7 [file 20849fa31d71d48a5938b1cf.xlsx]

## Sheet: Foglio1
Table 1. Principal Component Analysis (PCA) factors as obtained using Pain minus Placebo differences scores of HRV and EEG frequency band power scores (N = 62). We got three factors solution (Fact1, Fact2, and Fact3) by separate PCA analyses including HRV indices and, singly, each EEG band power of ϑ, α, β1, β2, and γ rhythms, performed respectively for Self- and Other- Pain conditions.
		Varimax Rotated Fact Pattern
		Self-Pain
Indices		ϑ (4-8 Hz)				α (9-13 Hz)				β1 (14-21 Hz)				β2 (22-32 Hz)				γ (33-40 Hz)
		Fact1	Fact2	Fact3		Fact1	Fact2	Fact3		Fact1	Fact2	Fact3		Fact1	Fact2	Fact3		Fact1	Fact2	Fact3
∆tHRV (ms)		0.05284	-0.40446	0.12591		0.01771	-0.07237	-0.67313		0.07643	-0.10256	0.21712		0.06199	-0.1311	0.2583		0.09676	-0.7628	-0.13765
∆SDNN (ms)		0.05536	-0.04143	0.89751		0.02664	-0.81006	-0.32031		0.02192	-0.04359	0.91093		0.03101	-0.01455	0.89929		0.05401	-0.11429	-0.8826
LF power (nu)		0.95932	-0.02822	0.04231		0.95649	-0.04701	-0.06876		0.95378	0.02738	0.06933		0.96167	0.05639	0.06429		0.9538	-0.00451	-0.03977
∆HF power (nu)		-0.9567	0.02375	-0.05772		-0.95634	0.06112	0.02896		-0.95261	0.0021	-0.09109		-0.95239	0.0969	-0.07735		-0.95763	-0.04146	0.06138
∆LF/HF ratio		0.9715	-0.0688	-0.01649		0.97349	0.02801	-0.07235		0.98004	0.00574	0.01665		0.97571	-0.09082	0.00826		0.97773	0.01956	0.01515
∆SamEn		-0.00506	0.09405	-0.8738		0.00061	0.89045	0.01537		0.02232	-0.04345	-0.84824		0.01782	0.00094	-0.85649		0.00678	-0.0738	0.88805
∆ln (EEG Freq Pow: Fz)		0.03902	0.80292	0.02077		-0.01253	0.10797	0.22703		0.03824	0.75645	0.10911		-0.0189	0.55603	0.04572		-0.16508	-0.32386	0.16026
∆ln (EEG Freq Pow: Cz)		0.0958	0.66399	-0.09586		0.13137	-0.42387	0.54543		-0.19714	0.8532	-0.14737		-0.09194	0.82568	-0.14938		0.14325	0.88324	-0.00125
∆ln (EEG Freq Pow: Pz)		-0.19223	0.64267	0.081		-0.18742	0.07331	0.72808		0.199	0.79893	-0.22032		0.01228	0.83449	-0.1663		-0.05653	0.39831	0.01496
		Other-Pain
Indices		ϑ (4-8 Hz)				α (9-13 Hz)				β1 (14-21 Hz)				β2 (22-32 Hz)				γ (33-40 Hz)
		Fact1	Fact2	Fact3		Fact1	Fact2	Fact3		Fact1	Fact2	Fact3		Fact1	Fact2	Fact3		Fact1	Fact2	Fact3
∆tHRV (ms)		-0.02664	0.02109	0.85255		-0.04304	0.79439	-0.18746		-0.02095	-0.07614	0.84901		-0.05164	-0.03094	0.85598		-0.00503	0.84296	-0.18445
∆SDNN (ms)		-0.60992	-0.17176	-0.28984		-0.53399	-0.41457	-0.22523		-0.60158	-0.17512	-0.2874		-0.60539	-0.30694	-0.41029		-0.63666	-0.26698	0.10393
LF power (nu)		0.95353	-0.01459	0.03759		0.94543	0.11149	-0.01333		0.95168	0.0047	0.04715		0.95042	-0.1237	0.04684		0.94004	0.02879	-0.01587
∆HF power (nu)		-0.94839	0.05905	-0.07928		-0.92492	-0.15608	-0.11666		-0.93961	-0.07118	-0.081		-0.93763	0.09477	-0.08676		-0.94385	-0.05409	-0.03525
∆LF/HF ratio		0.94811	-0.04255	0.00813		0.94455	0.06968	0.03235		0.94523	0.07234	0.0115		0.94873	-0.08067	0.00347		0.92851	0.01444	0.08865
∆SampEn		0.2656	0.04306	0.78275		0.18784	0.82271	0.12054		0.26968	-0.02994	0.79595		0.23413	-0.25492	0.76897		0.31606	0.73124	0.00545
∆ln (EEG Band Pow: Fz)		0.02316	0.755	-0.25241		-0.12489	0.15071	0.81134		0.23592	0.5791	-0.14424		0.12764	0.78337	-0.06956		-0.231	0.33222	0.50431
∆ln (EEG Band Pow: Cz)		-0.04046	0.67918	0.10944		0.14645	-0.2095	0.75483		0.03796	0.79815	-0.13934		-0.05385	0.67671	-0.06562		0.27358	-0.2053	0.73258
∆ln (EEG Band Pow: Pz)		0.03787	0.67999	0.14878		-0.4851	0.15688	0.23542		-0.04457	0.75296	0.17511		-0.21102	0.69926	-0.07359		-0.05207	-0.12663	0.71195
Notes - Pain minus Placebo difference scores (∆) for the indices of R-R: mean of RR intervals; SDNN: standard deviation of RR intervals; LF: low frequency; HF: high frequency; SampEn : sample entropy; ln (EEG Band Pow): natural logarithm transform of each EEG band power of interest (ϑ, α, β1, β2, and γ) at Fz, Cz, and Pz recording sites.
